# Supplementary material
Source: HighWire-hosted journal article supplement (https://cmaj.ca/highwire/filestream/74170/field_highwire_adjunct_files/3/190355-res-4-at.pdf)
Supplement: 190355-res-4-at.pdf [file 190355-res-4-at.pdf]

## **Appendix 4 (as supplied by the authors)**

### Cancer incidence rate ratios

Appendix to: Brenner DR, Ruan Y, Shaw E, et al. Age-standardized cancer-incidence trends in Canada, 1971–2015. *CMAJ* 2019. doi: 10.1503/cmaj.190355.

Copyright © 2019 The Author(s) or their employer(s).

To receive this resource in an accessible format, please contact us at [cmajgroup@cmaj.ca](mailto:cmajgroup@cmaj.ca).

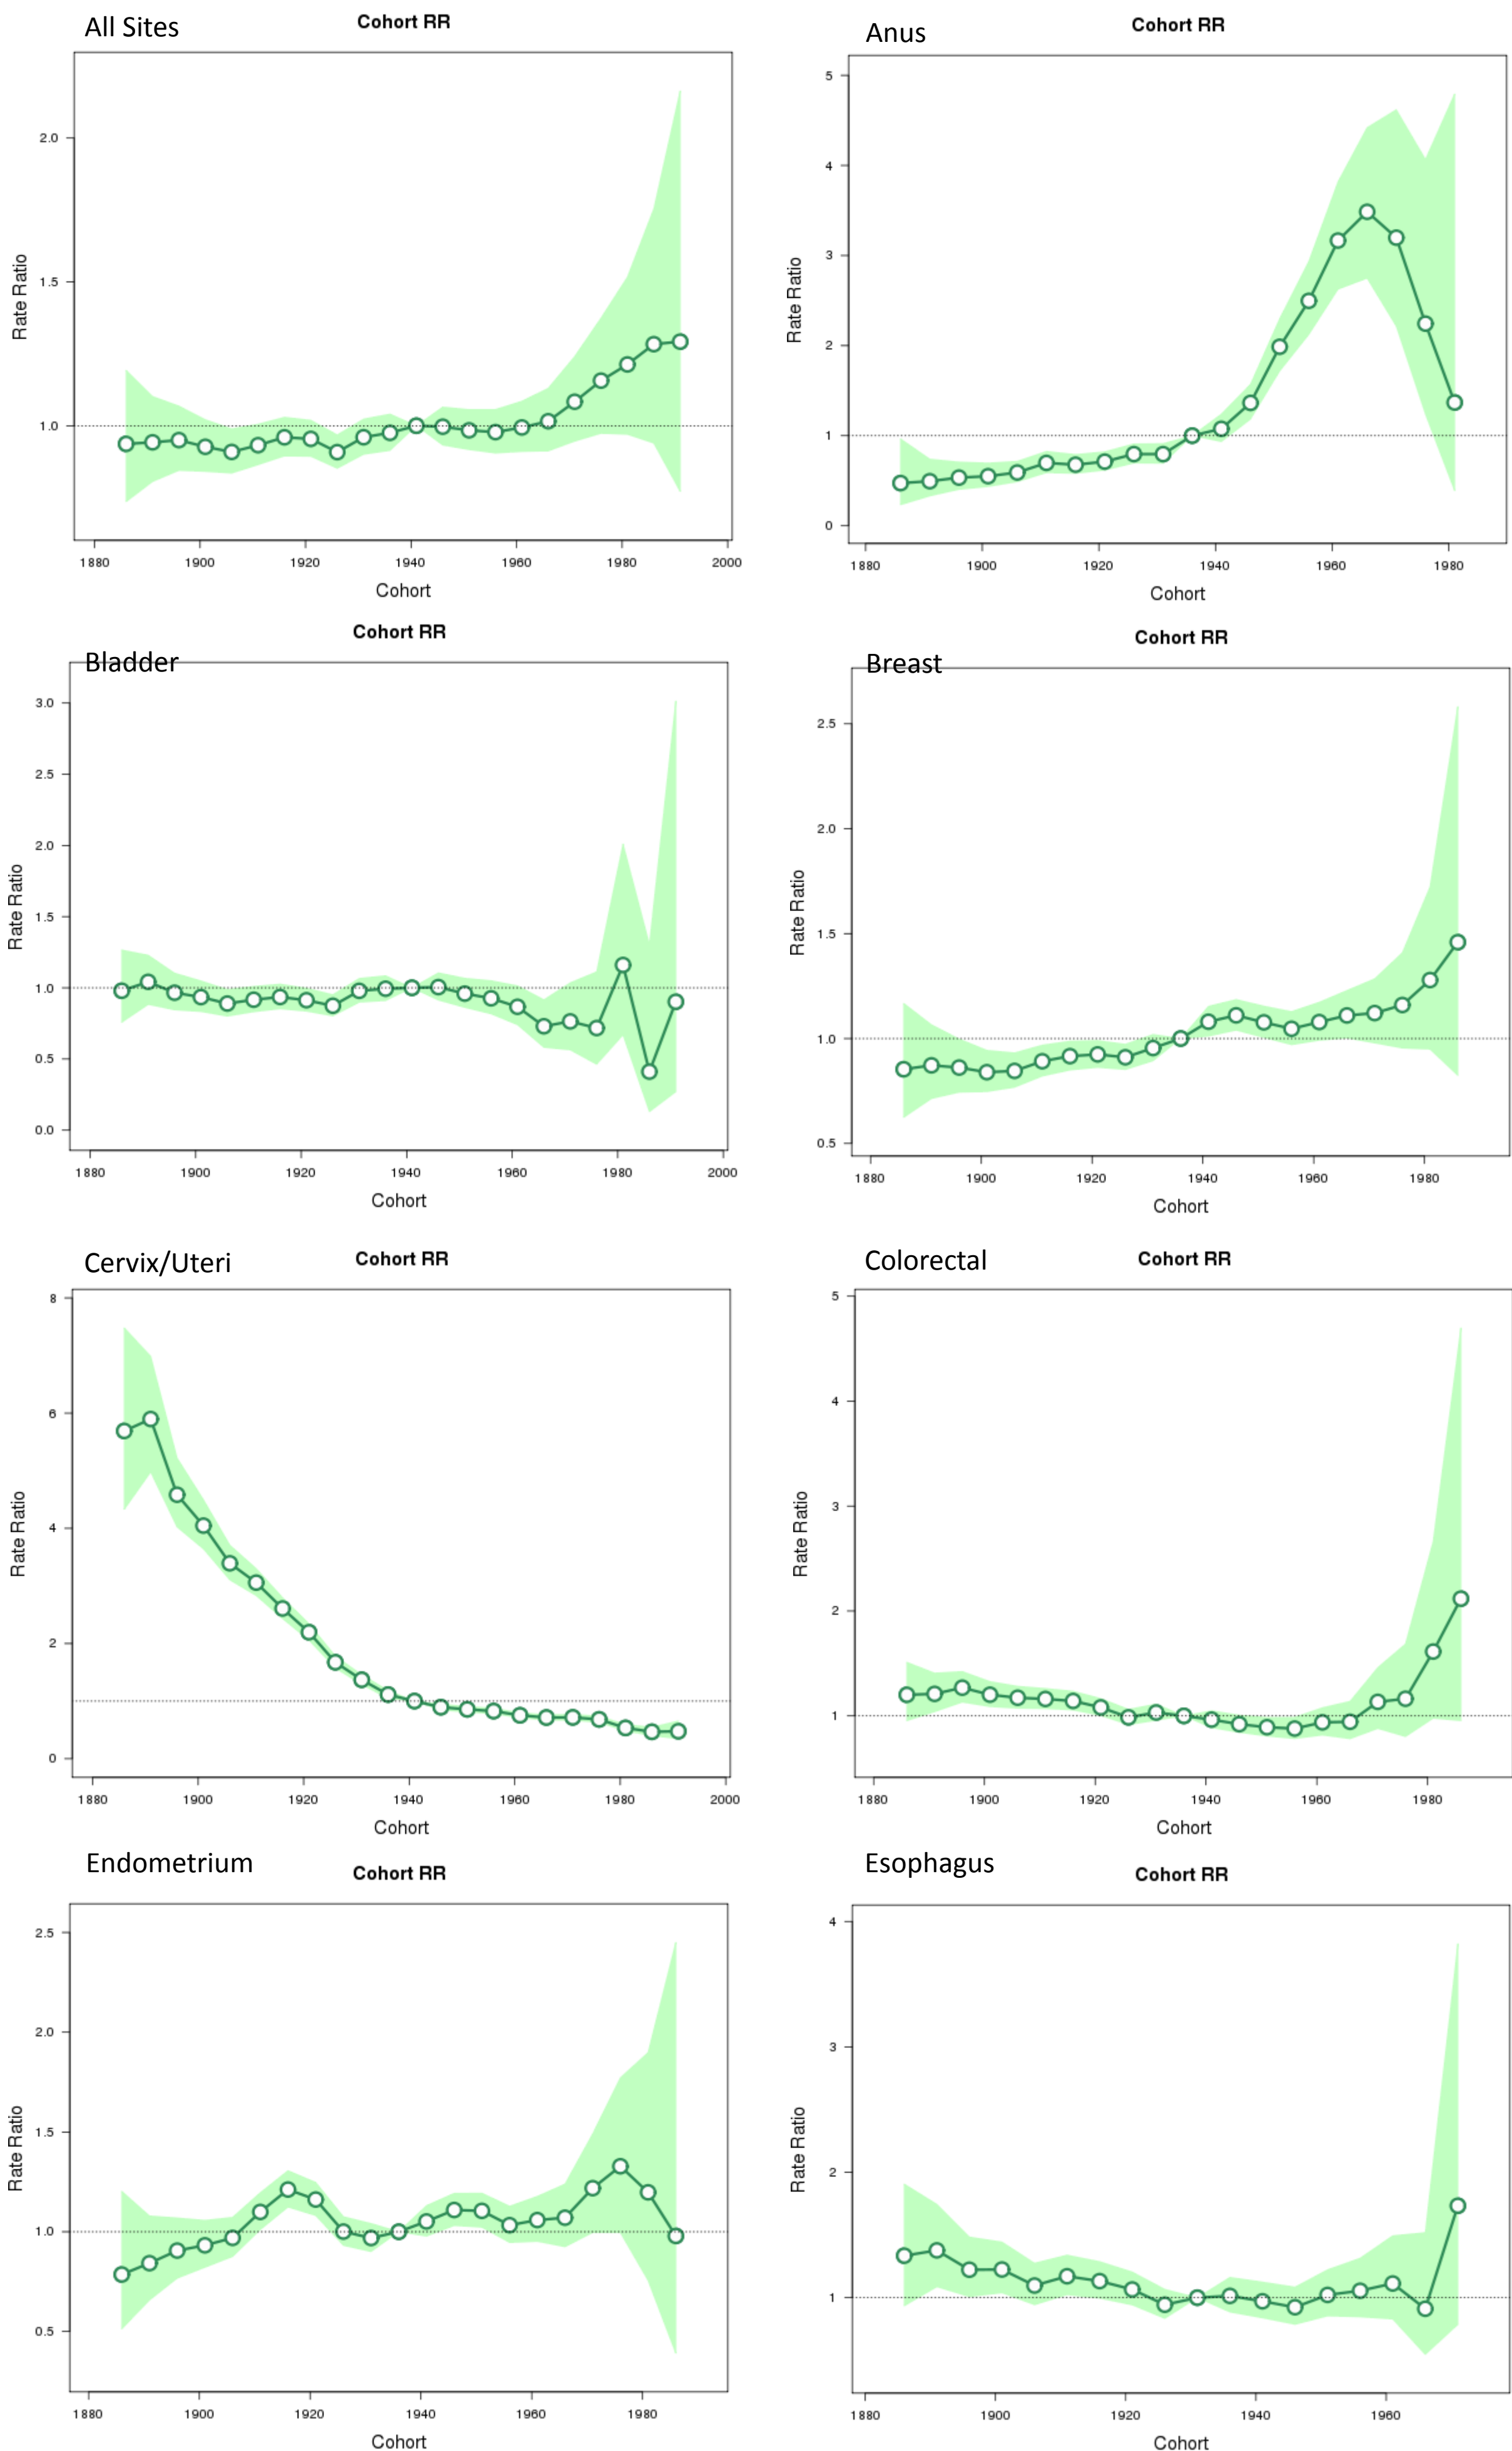

Figure 1. Cancer incidence rate ratios (95% confidence intervals represented by shaded area) by five-year cohort in females relative to the 1941-1945 reference category.

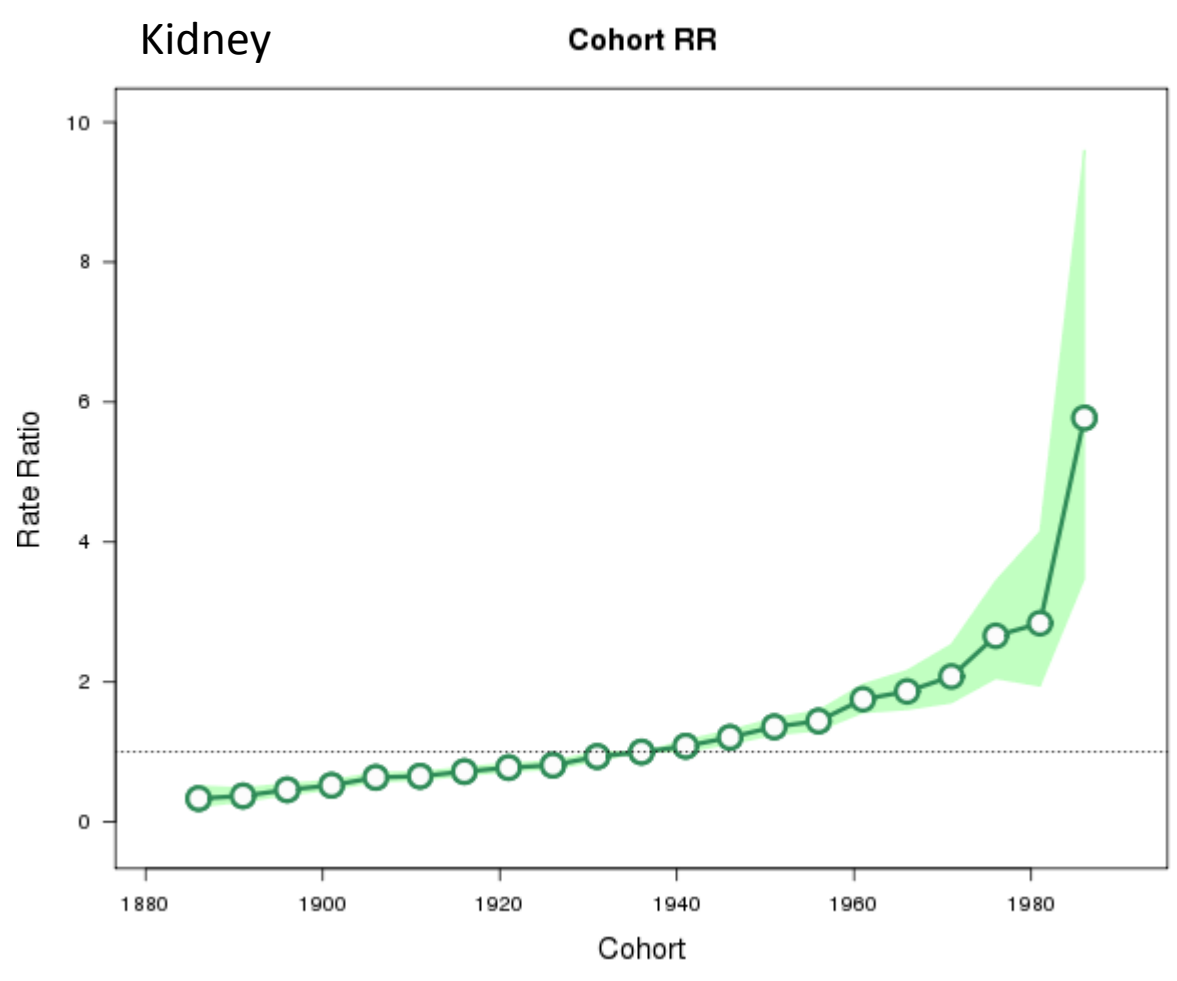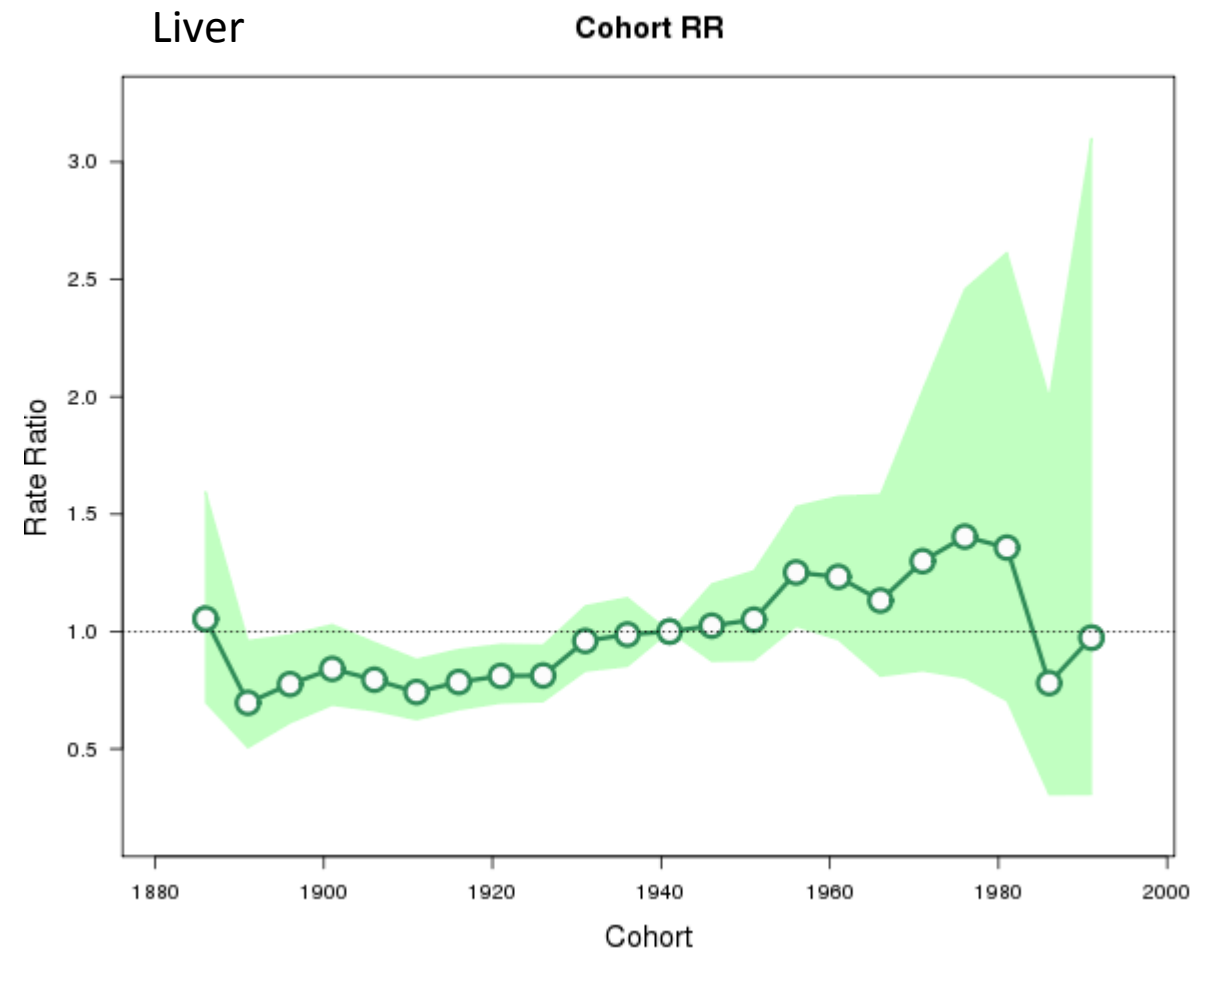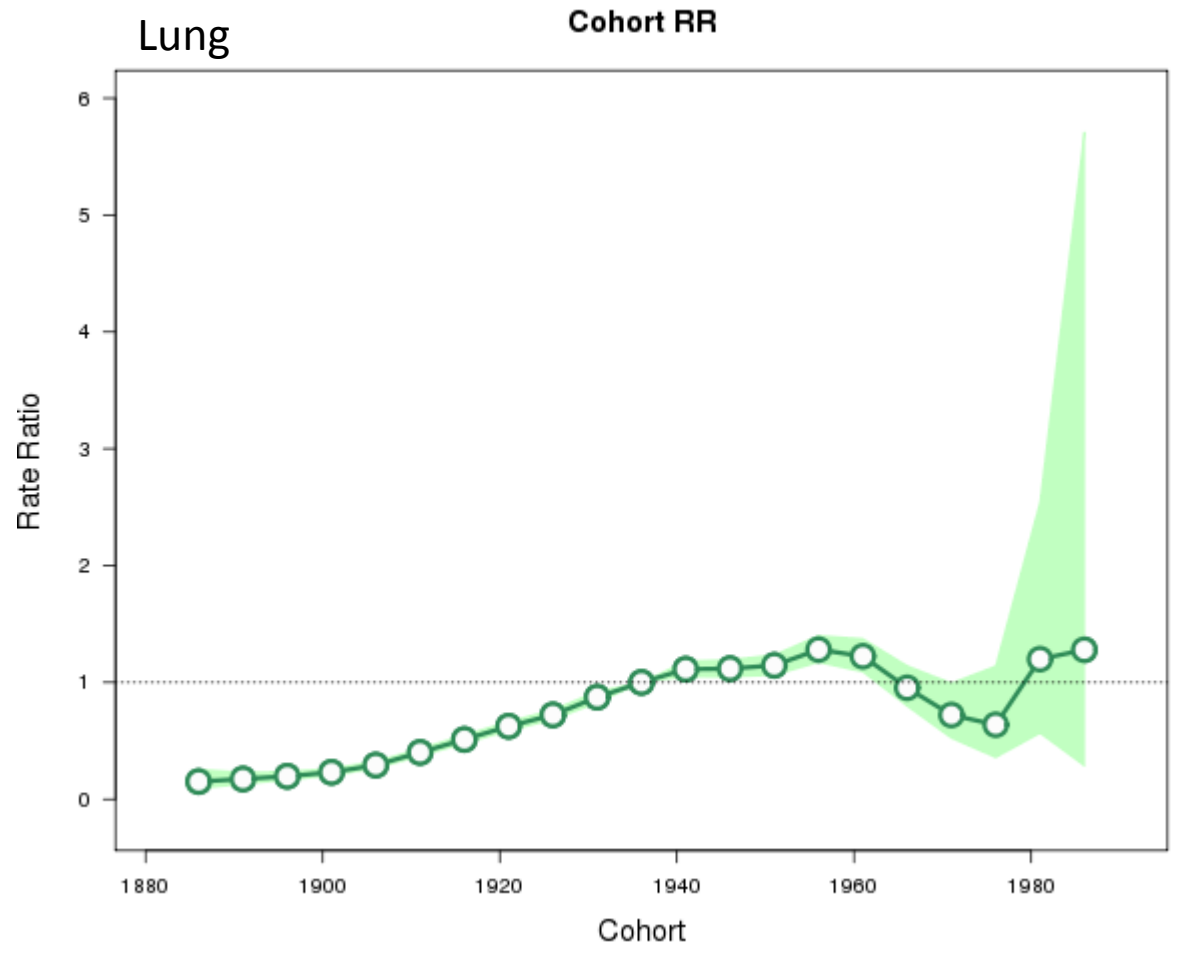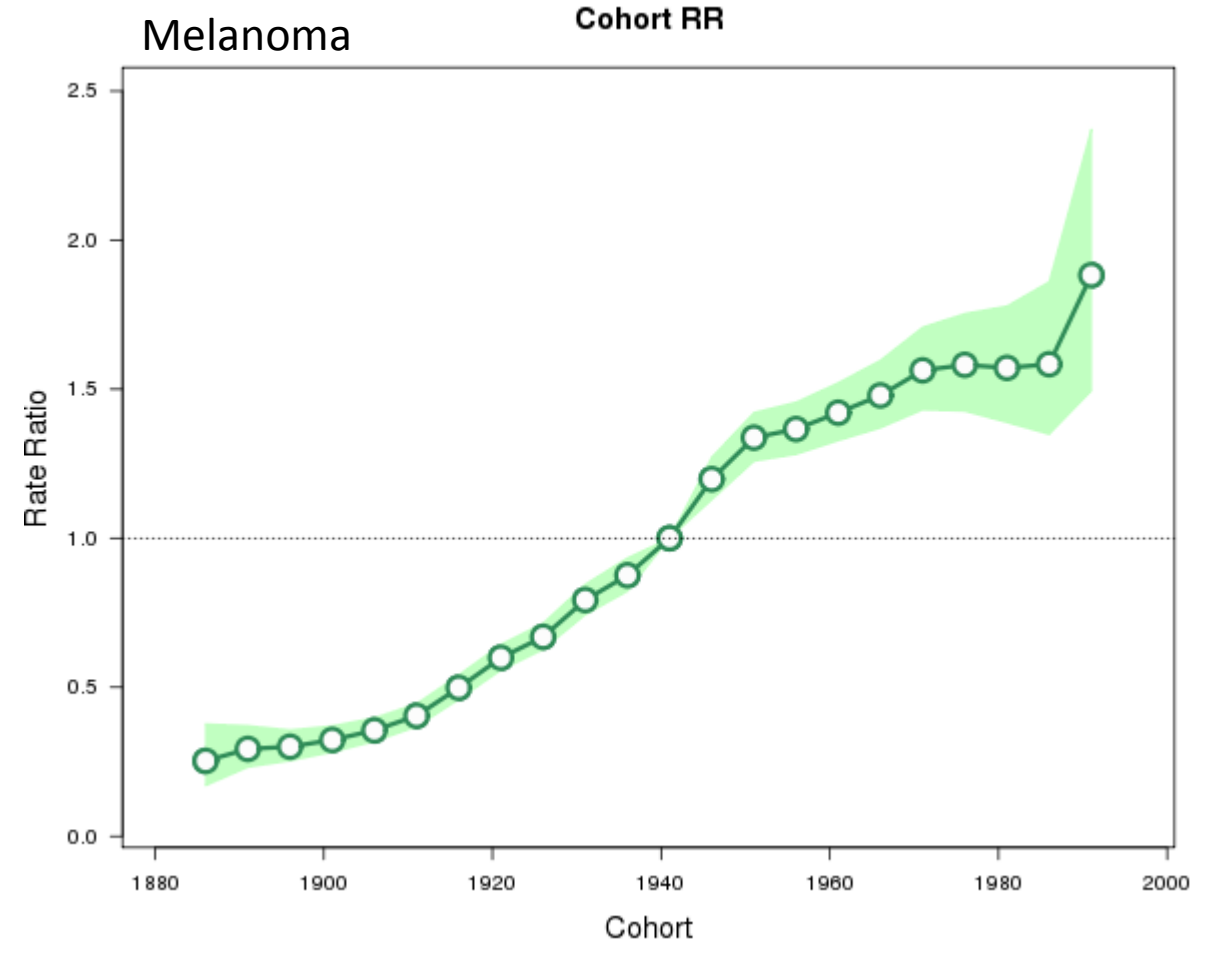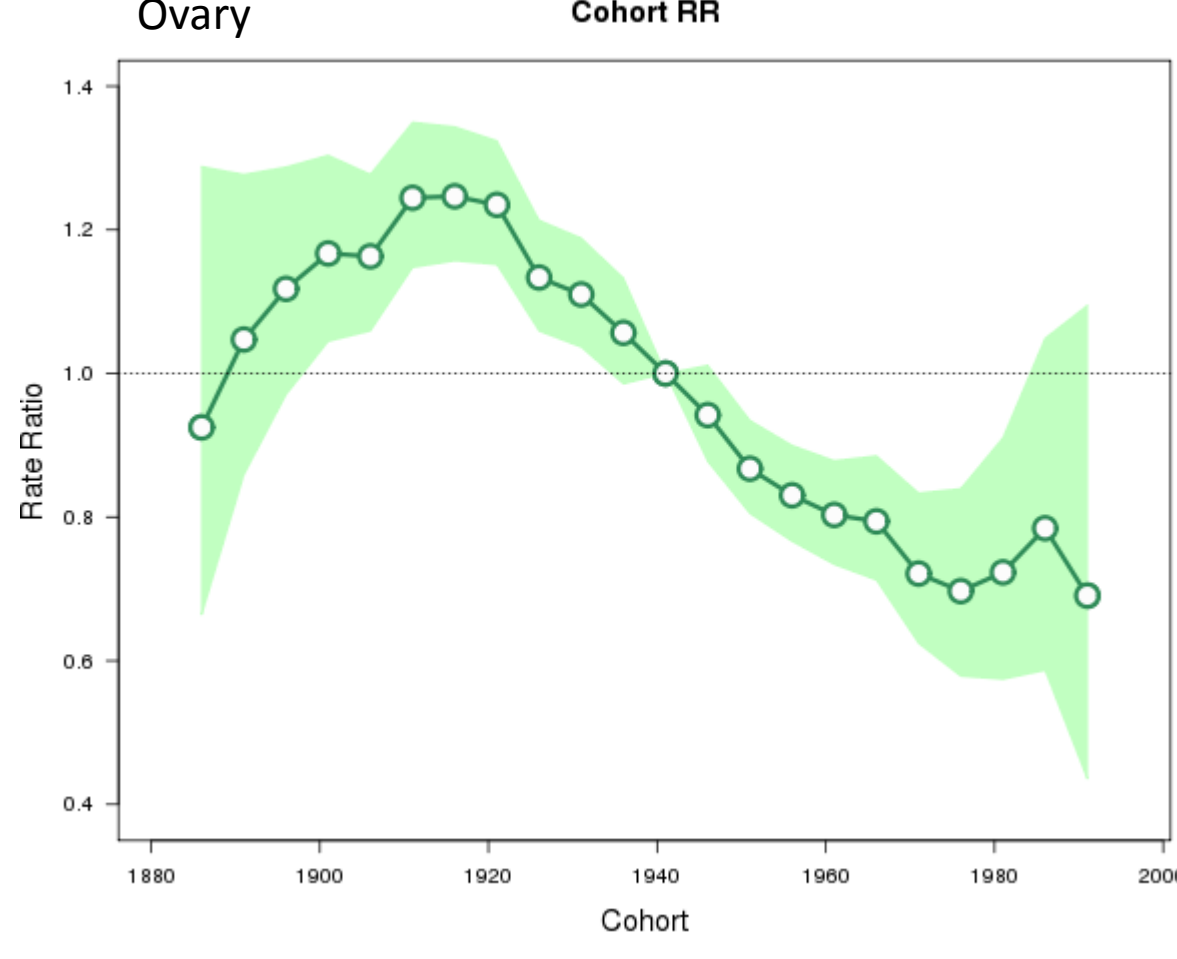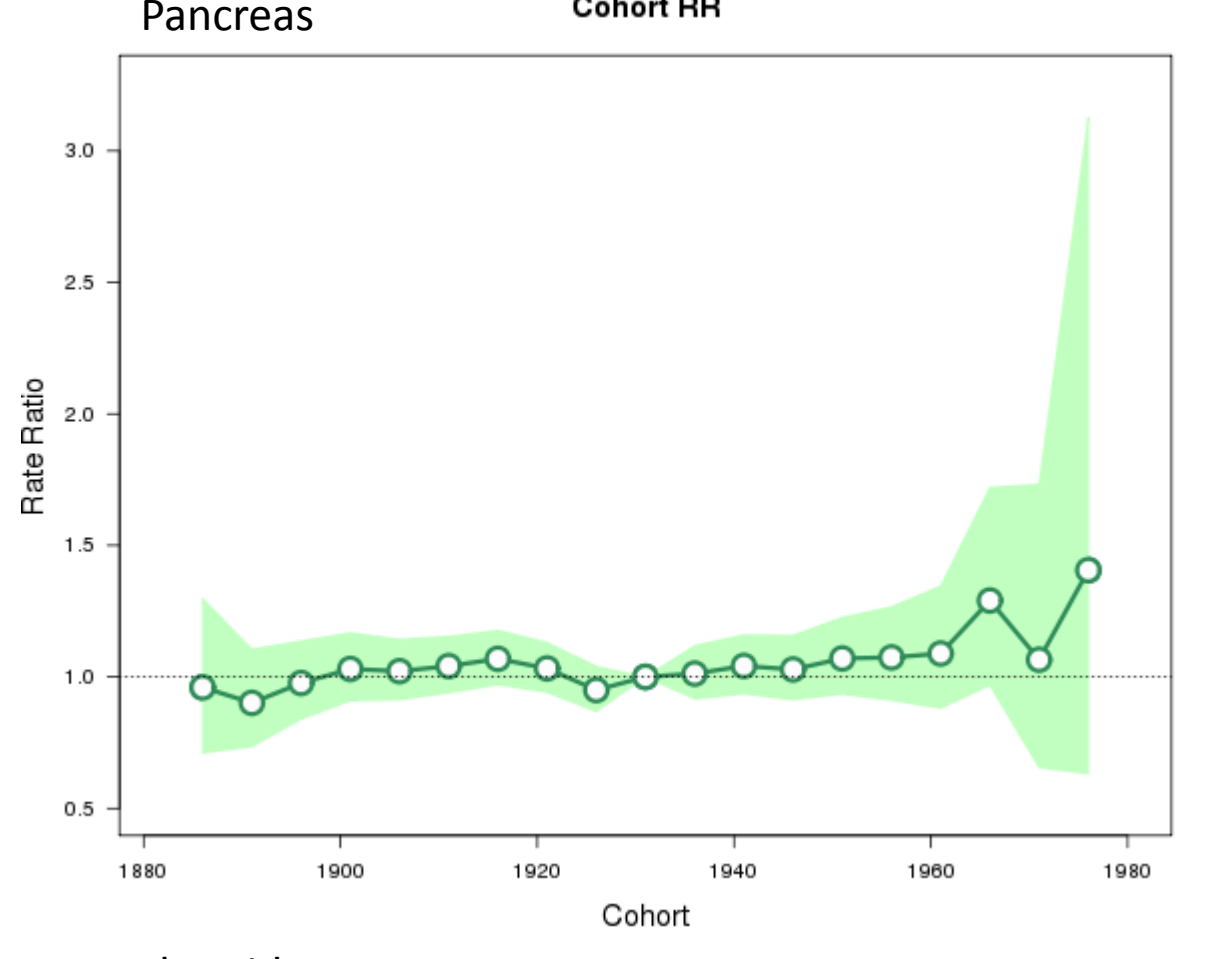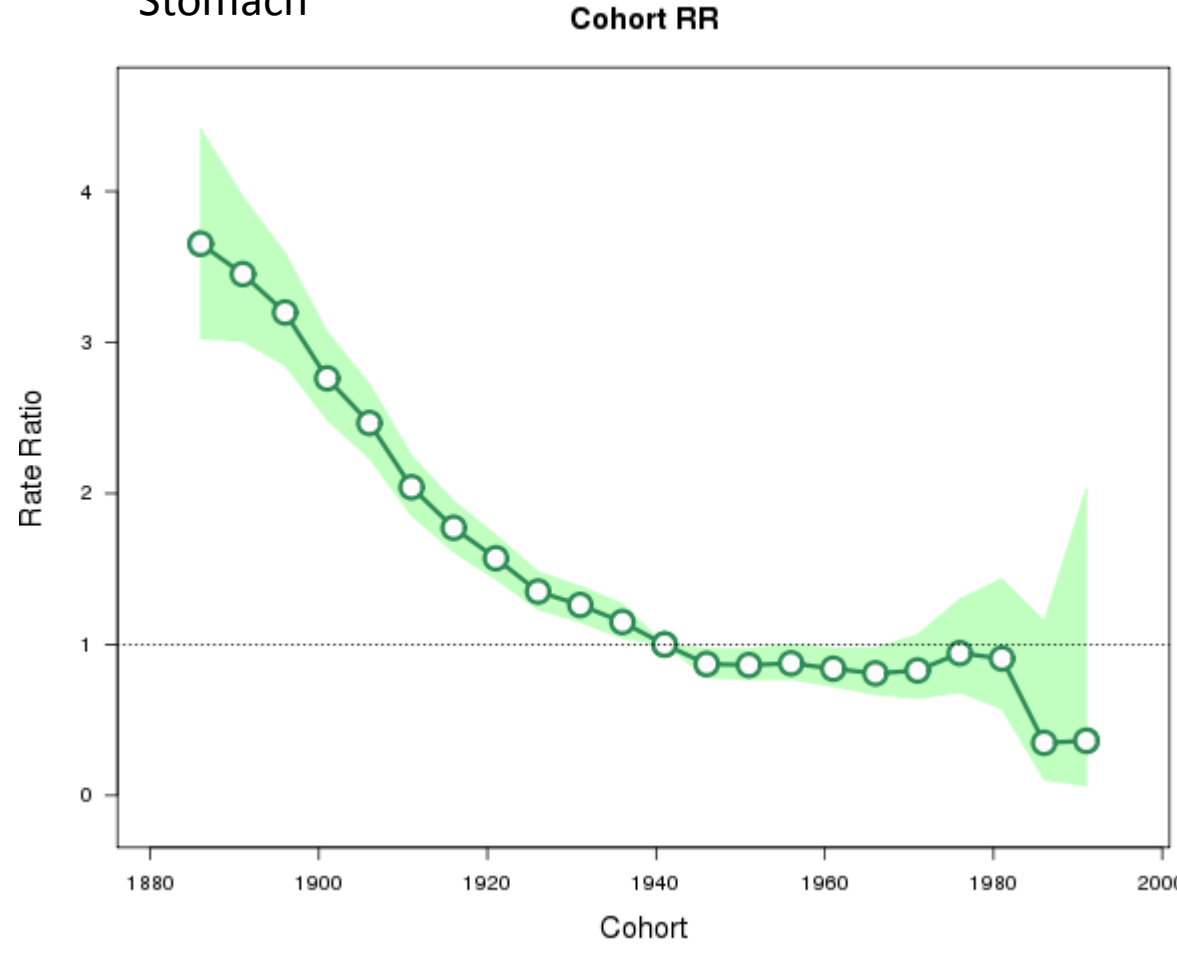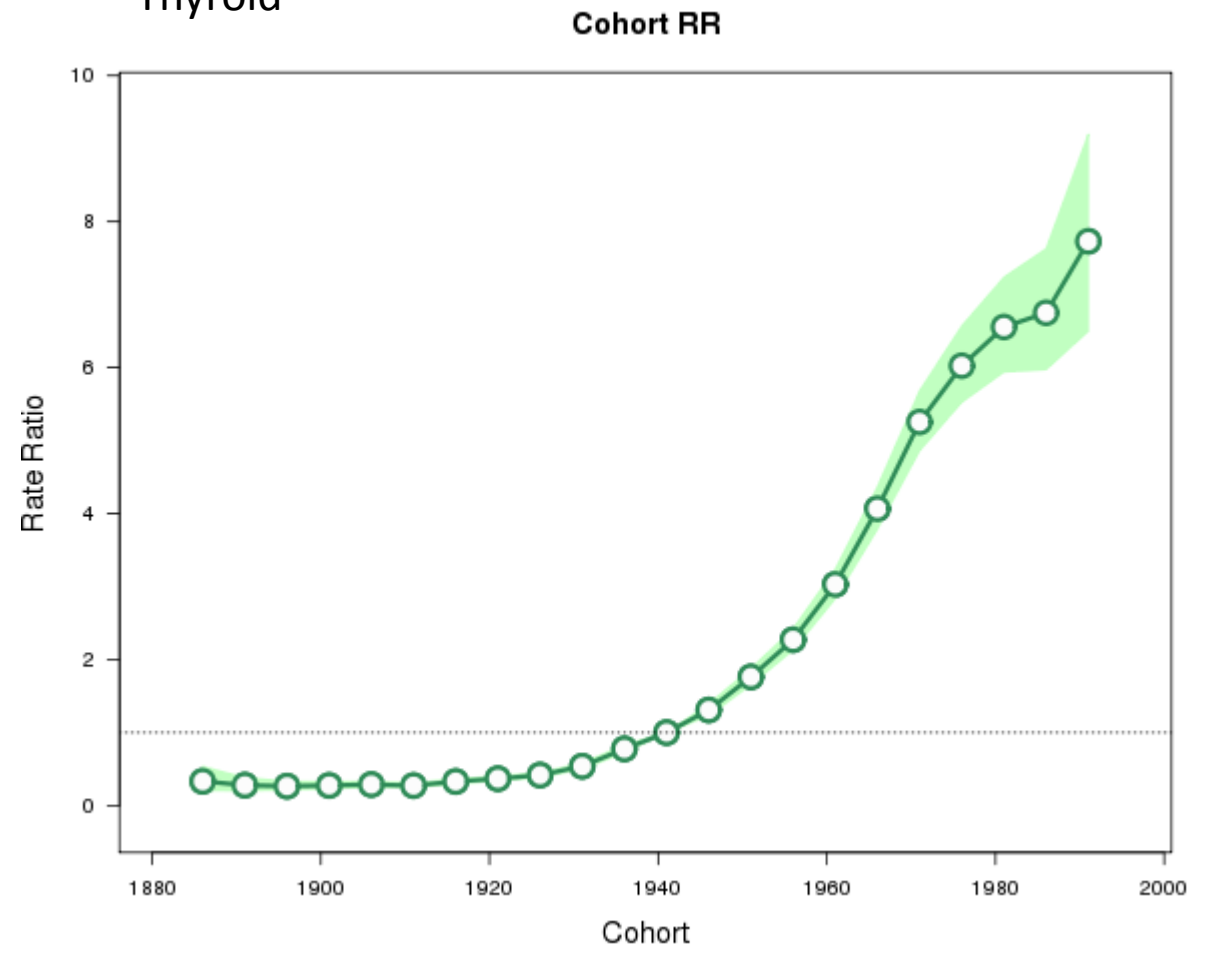

Figure 1 continued. Cancer incidence rate ratios (95% confidence intervals represented by shaded area) by five-year cohort in females relative to the 1941-1945 reference category.

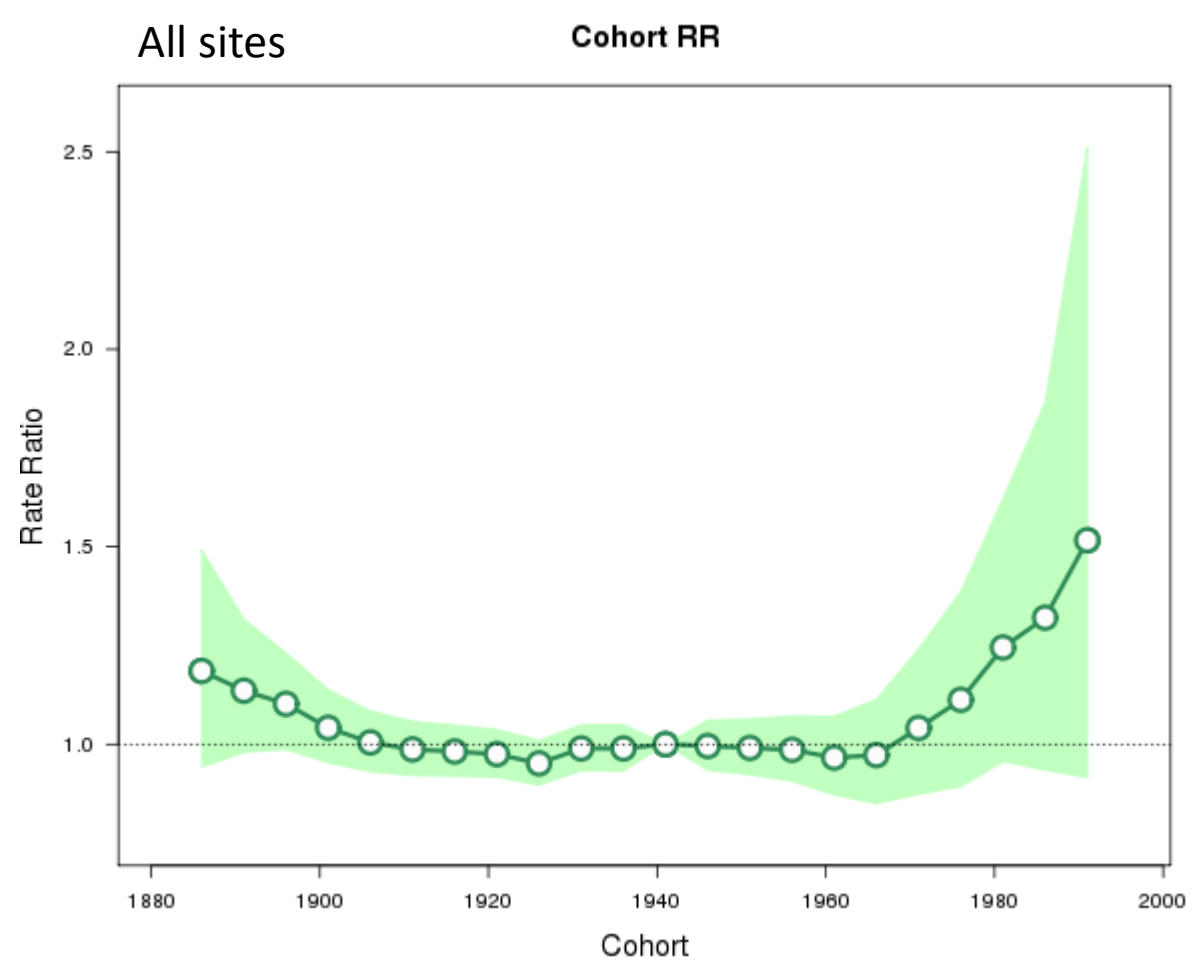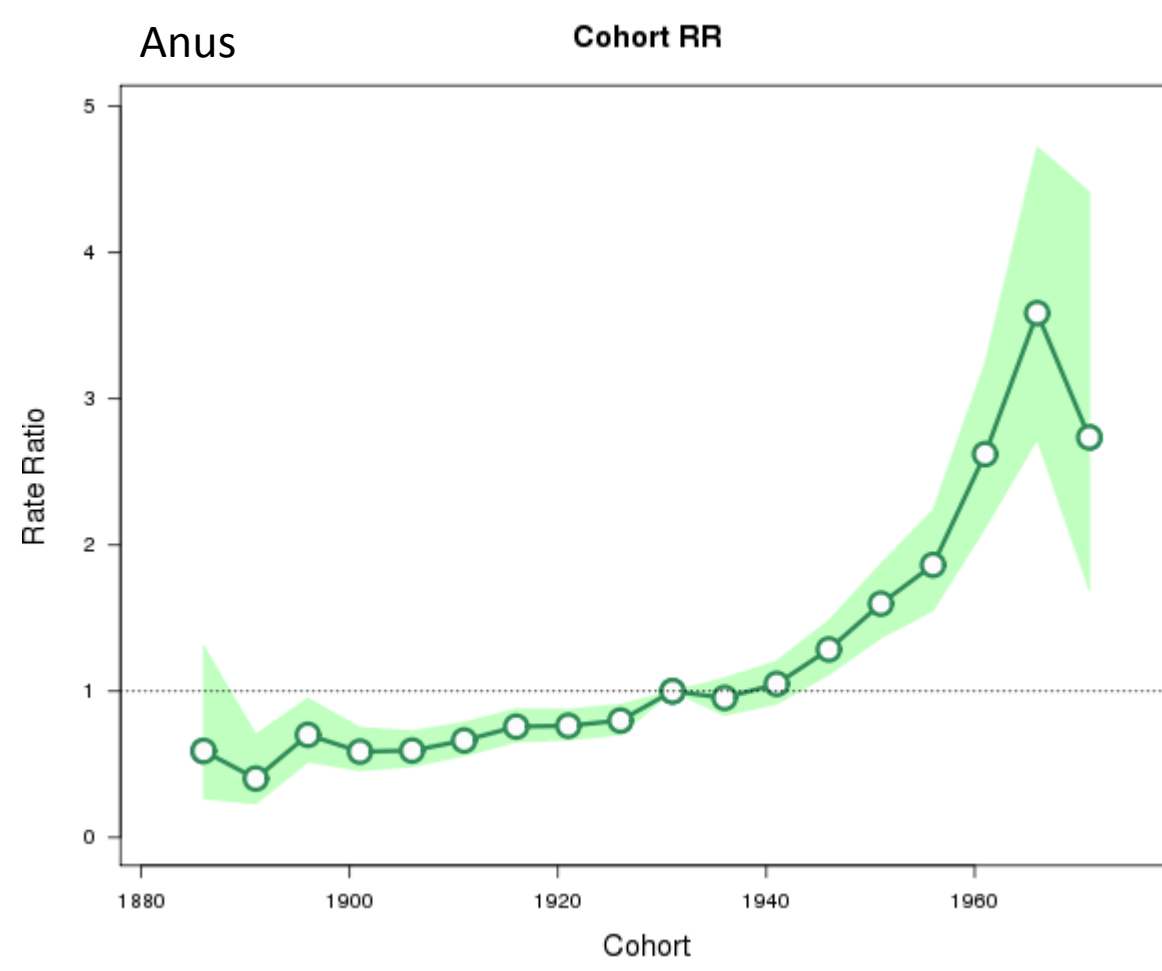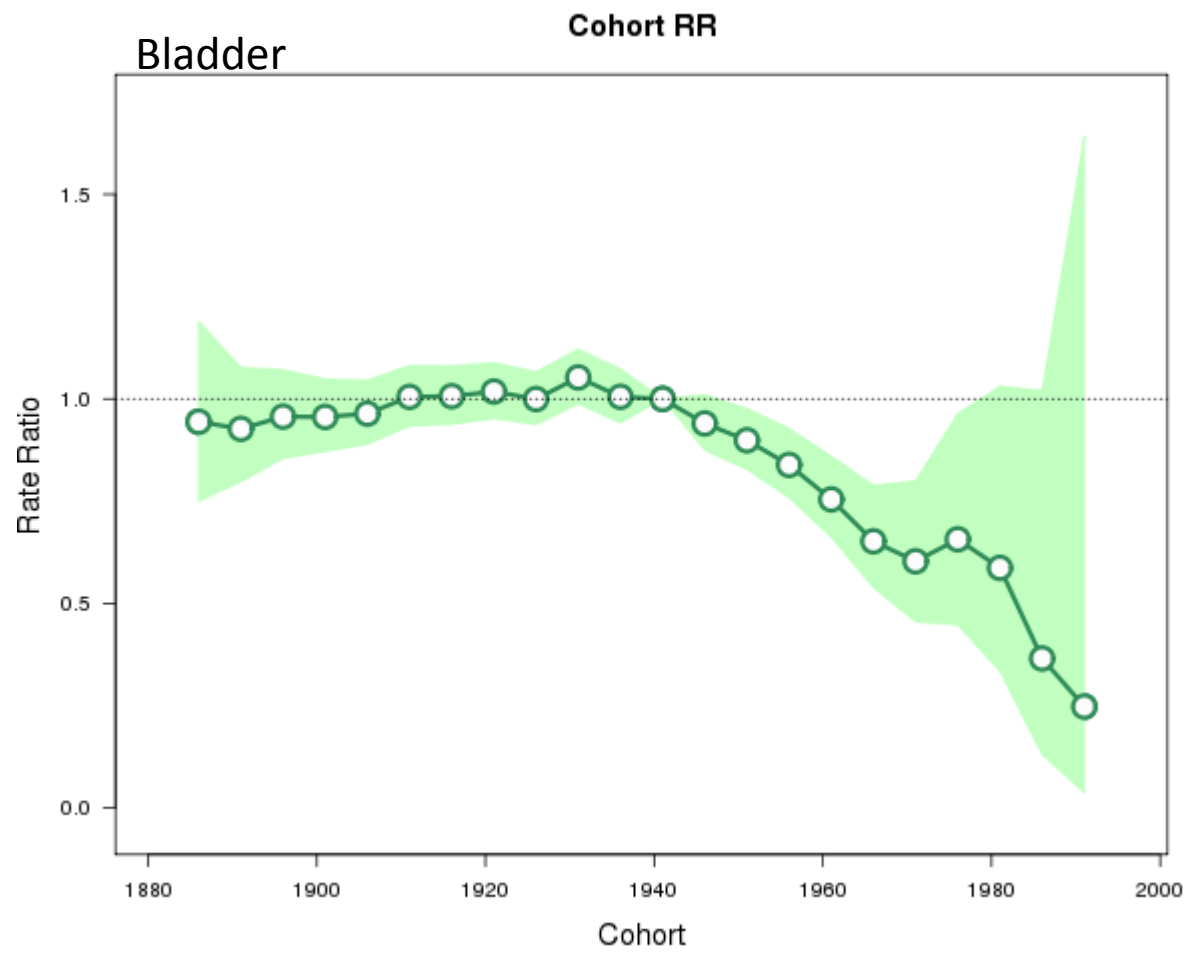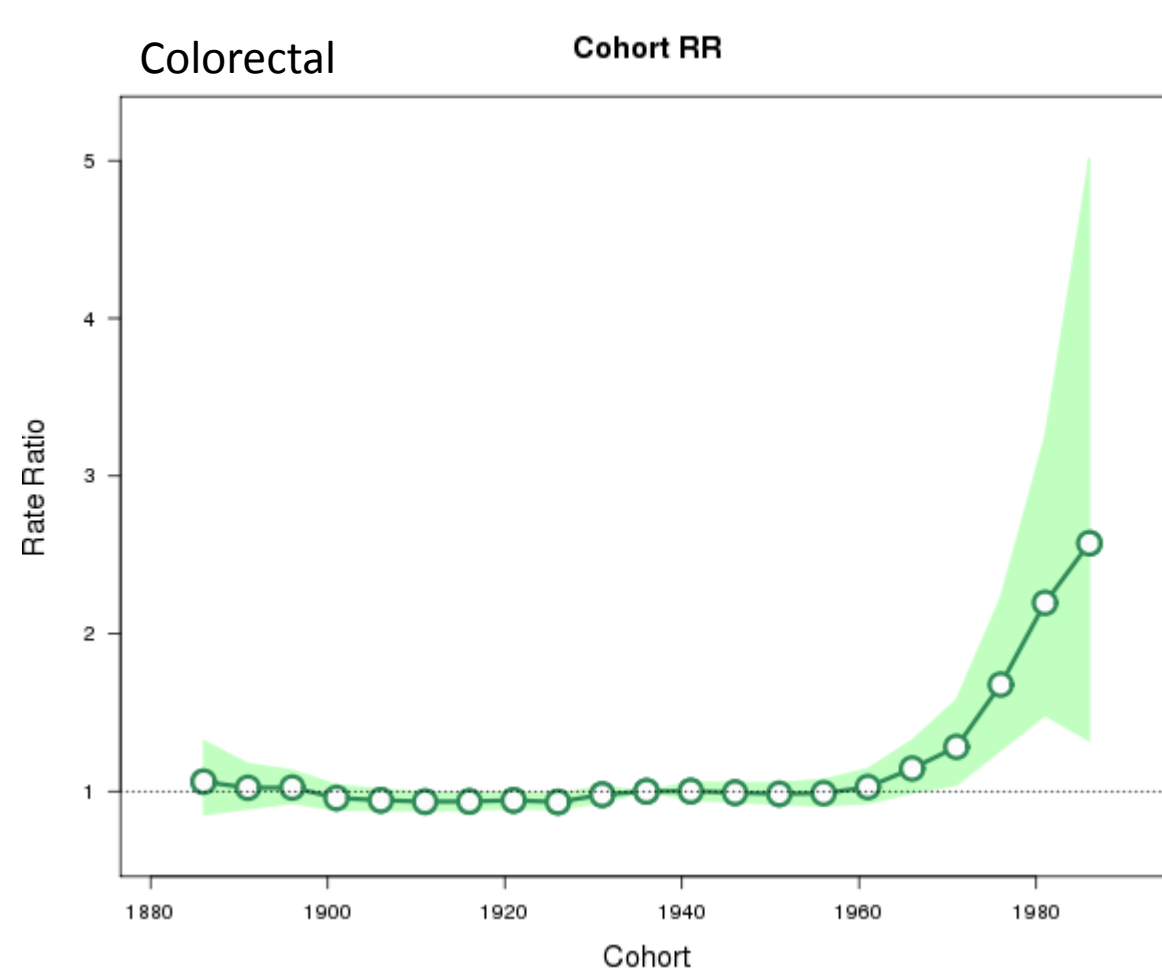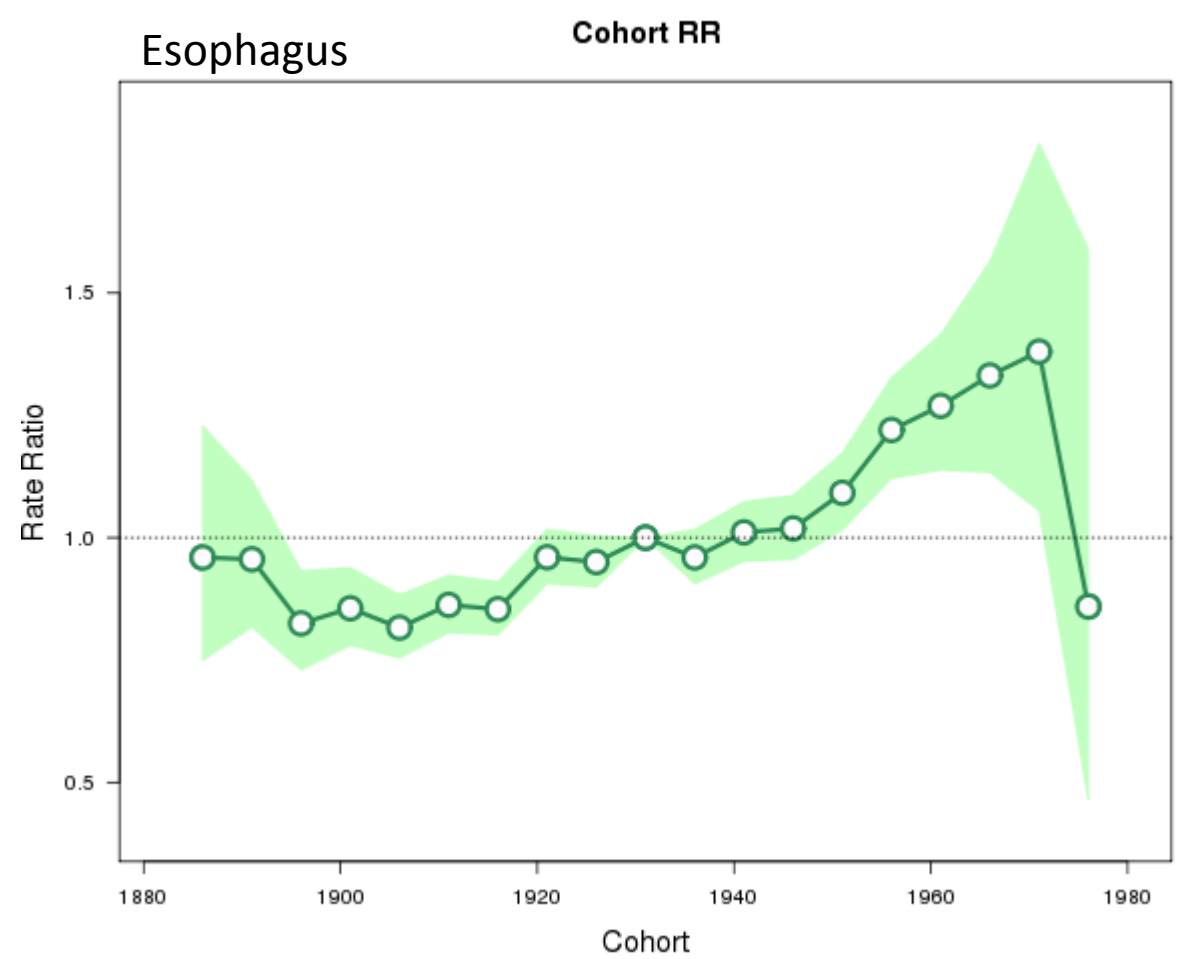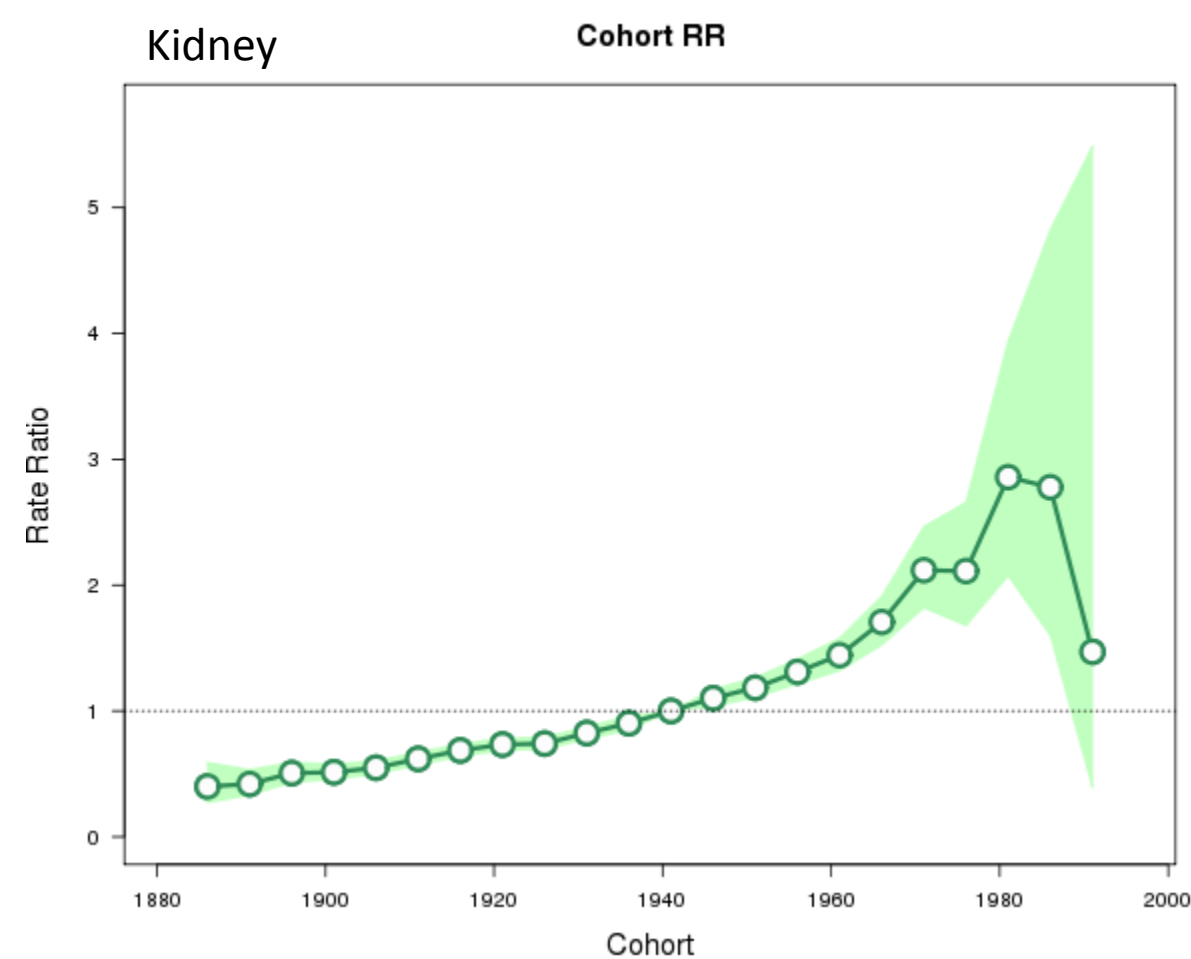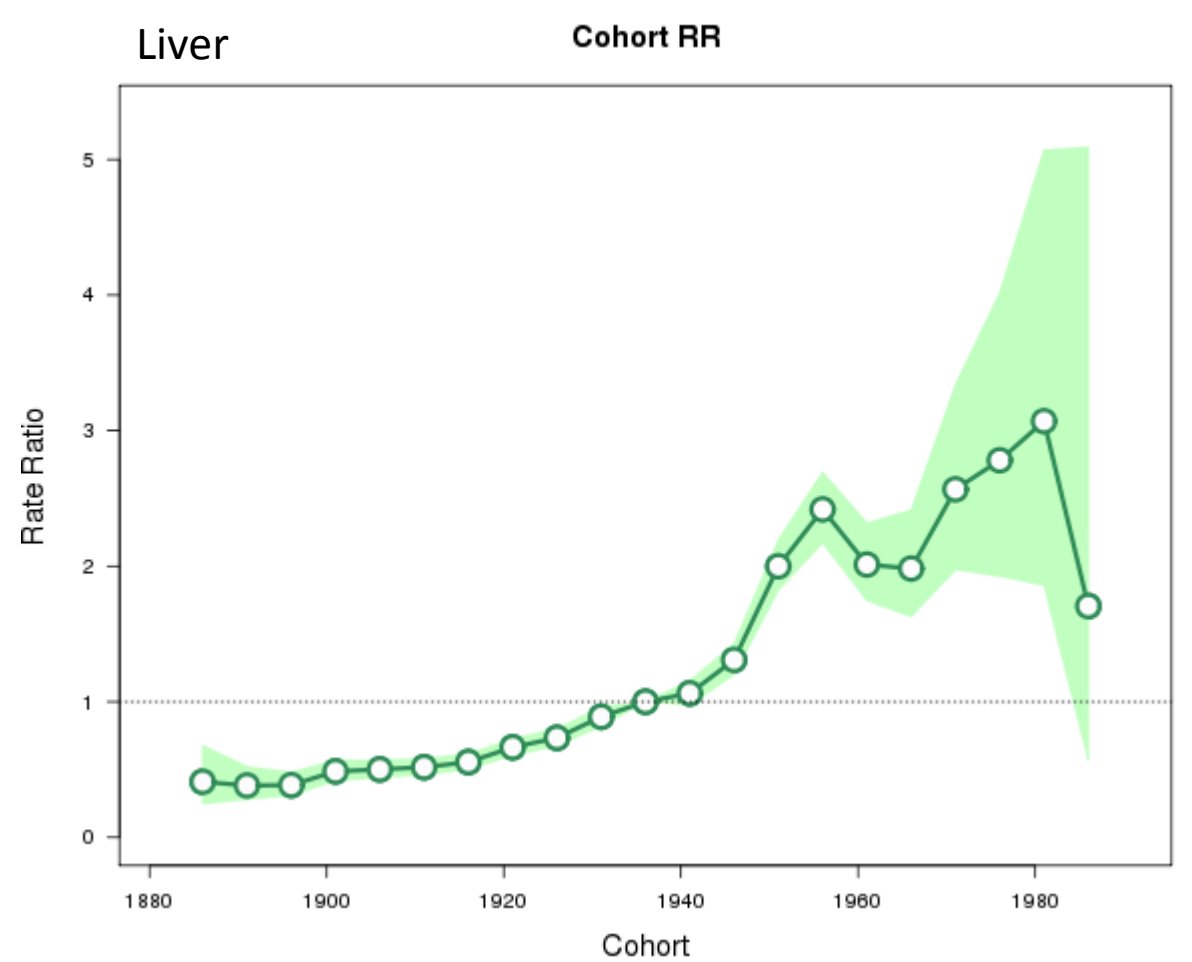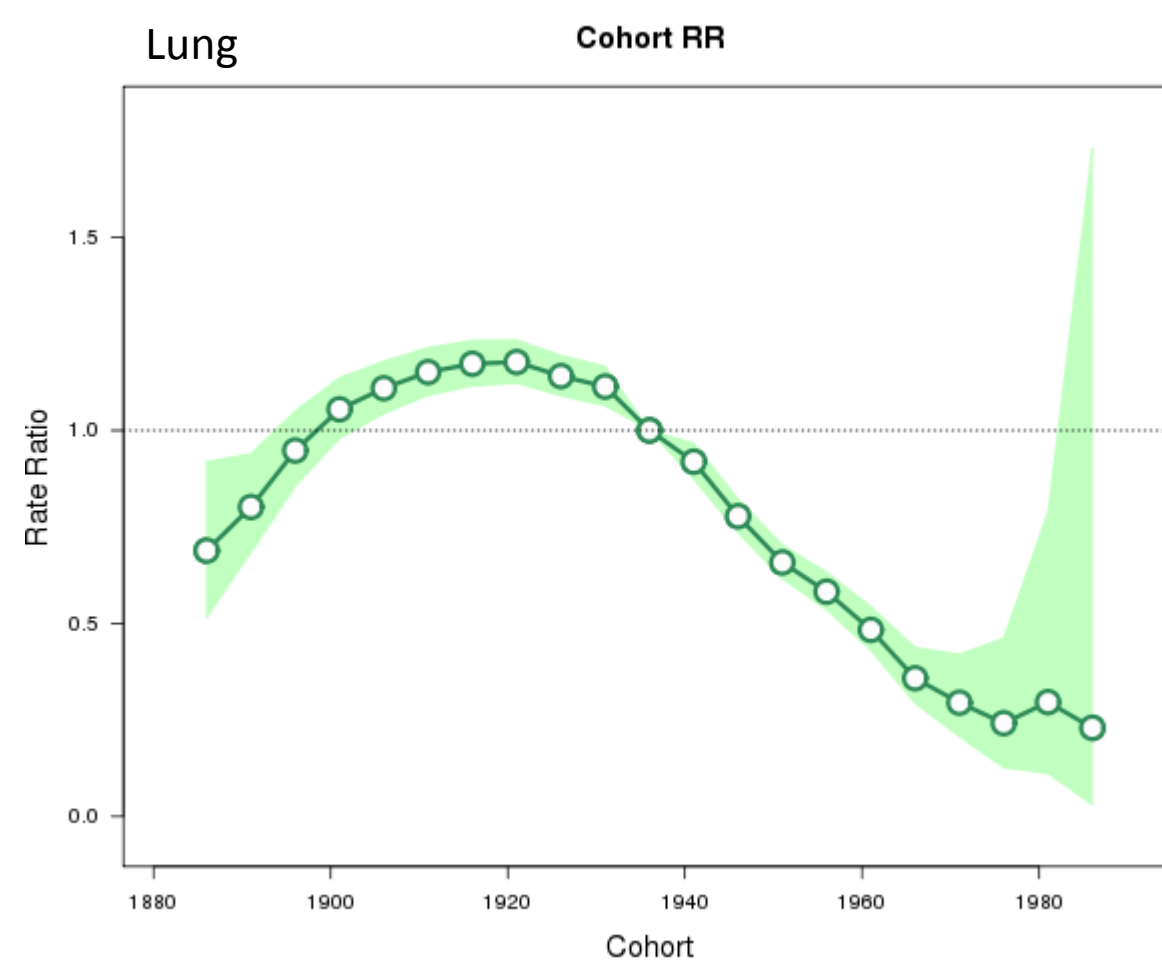

Figure 2. Cancer incidence rate ratios (95% confidence intervals represented by shaded area) by five-year cohort in males relative to the 1941-1945 reference category.

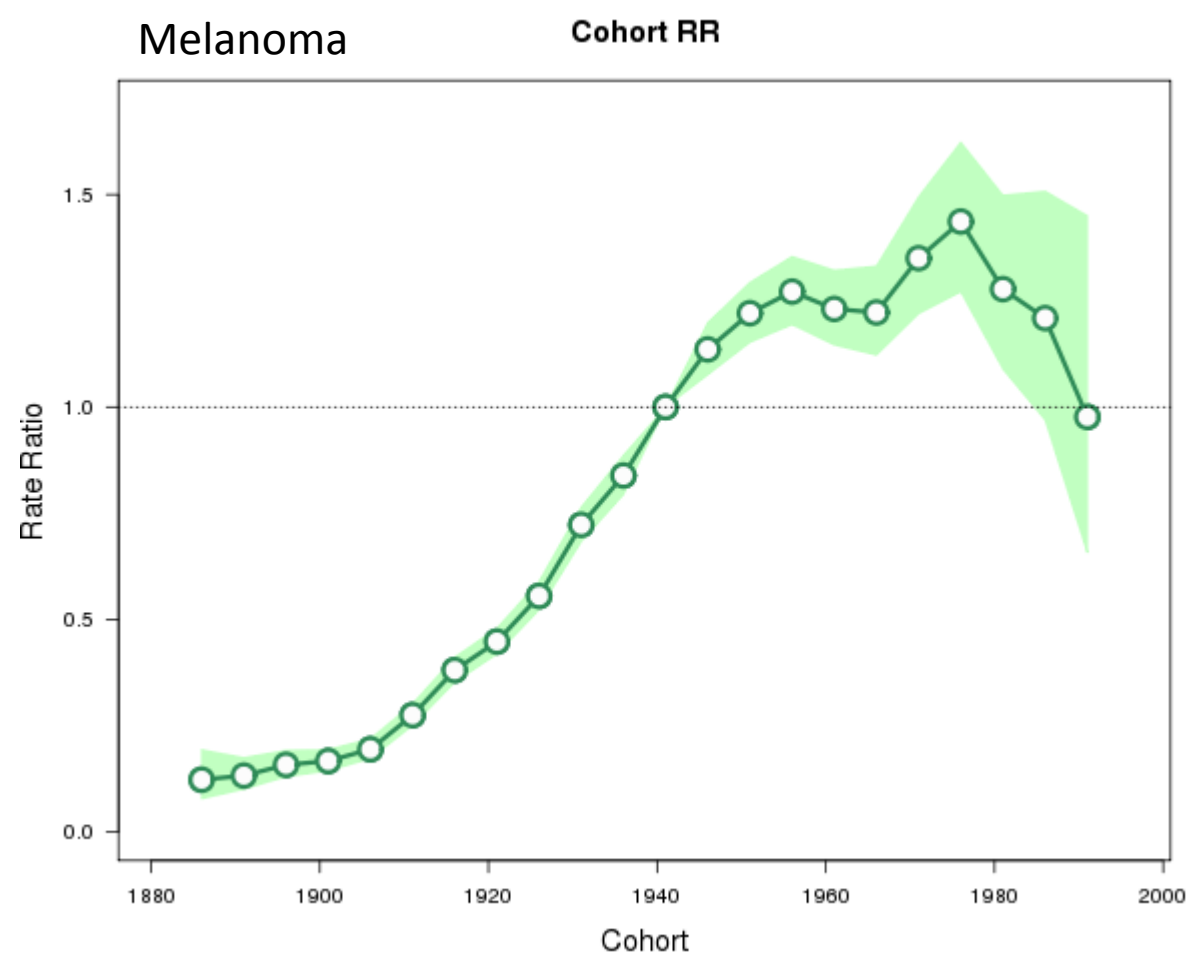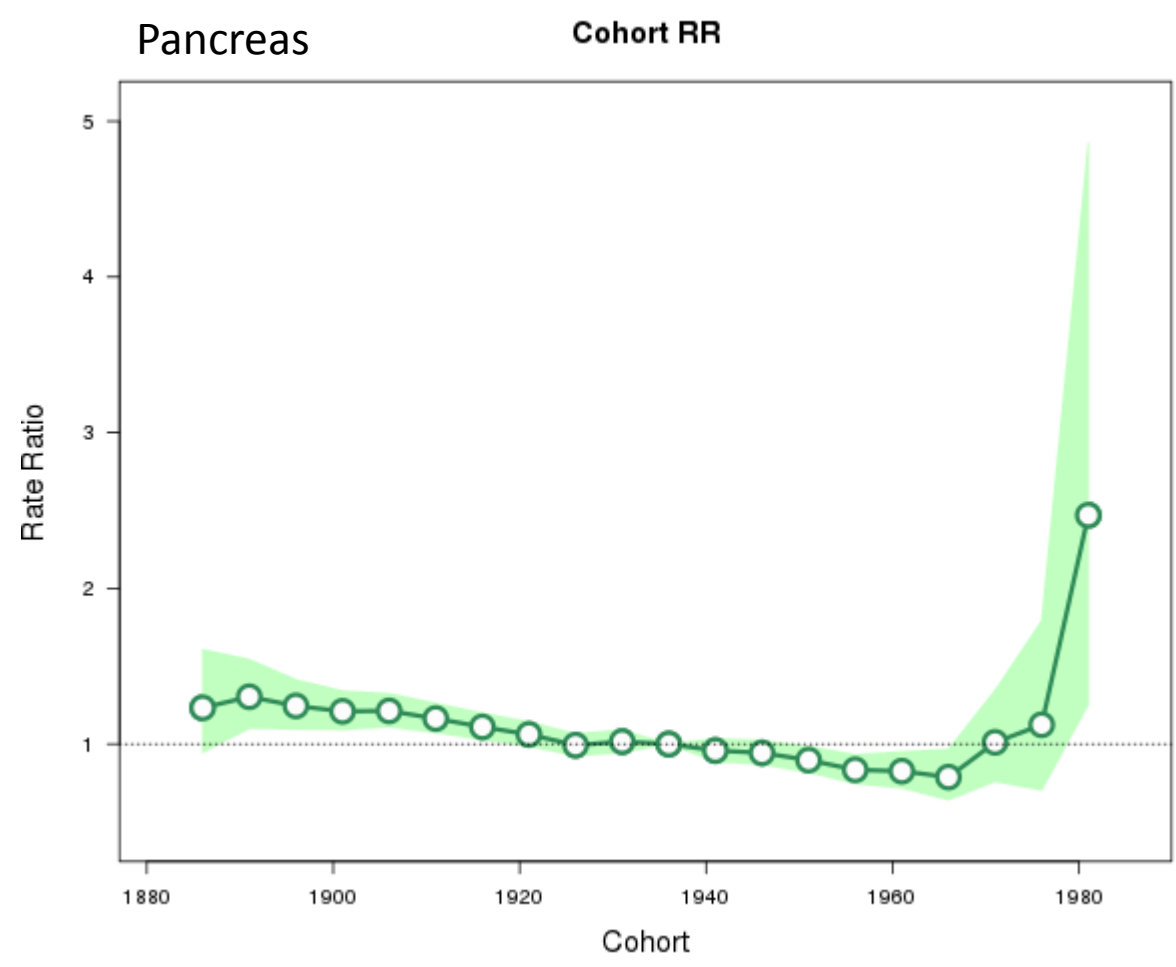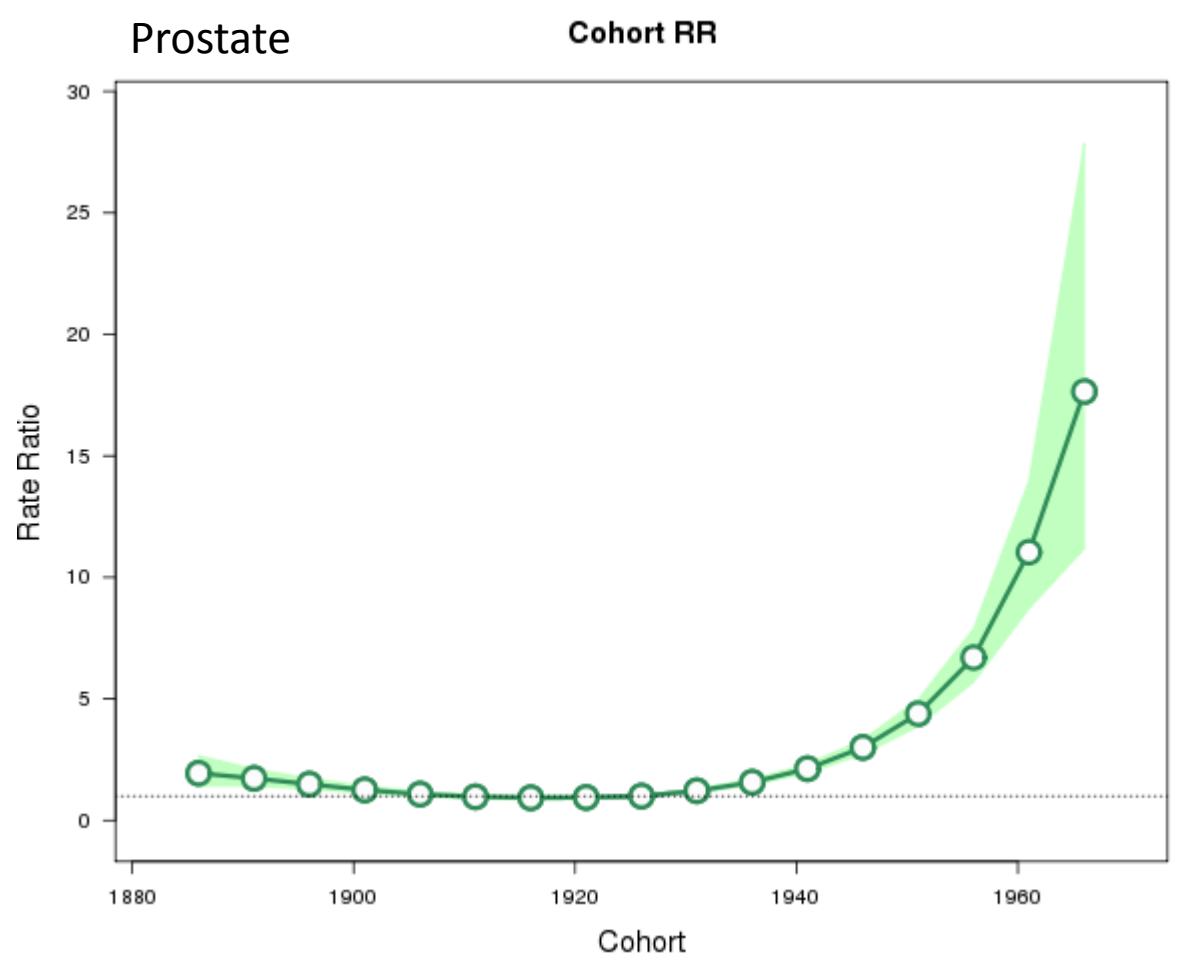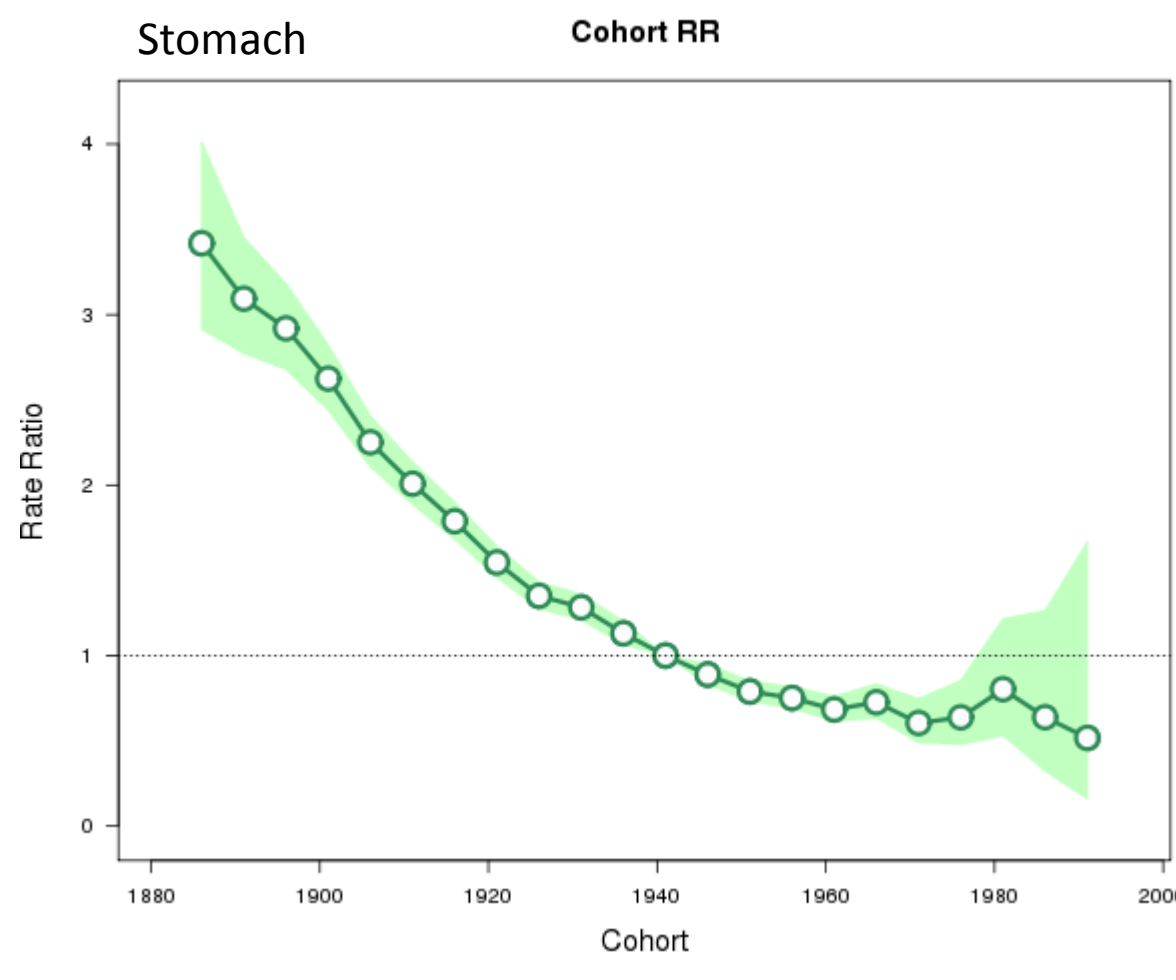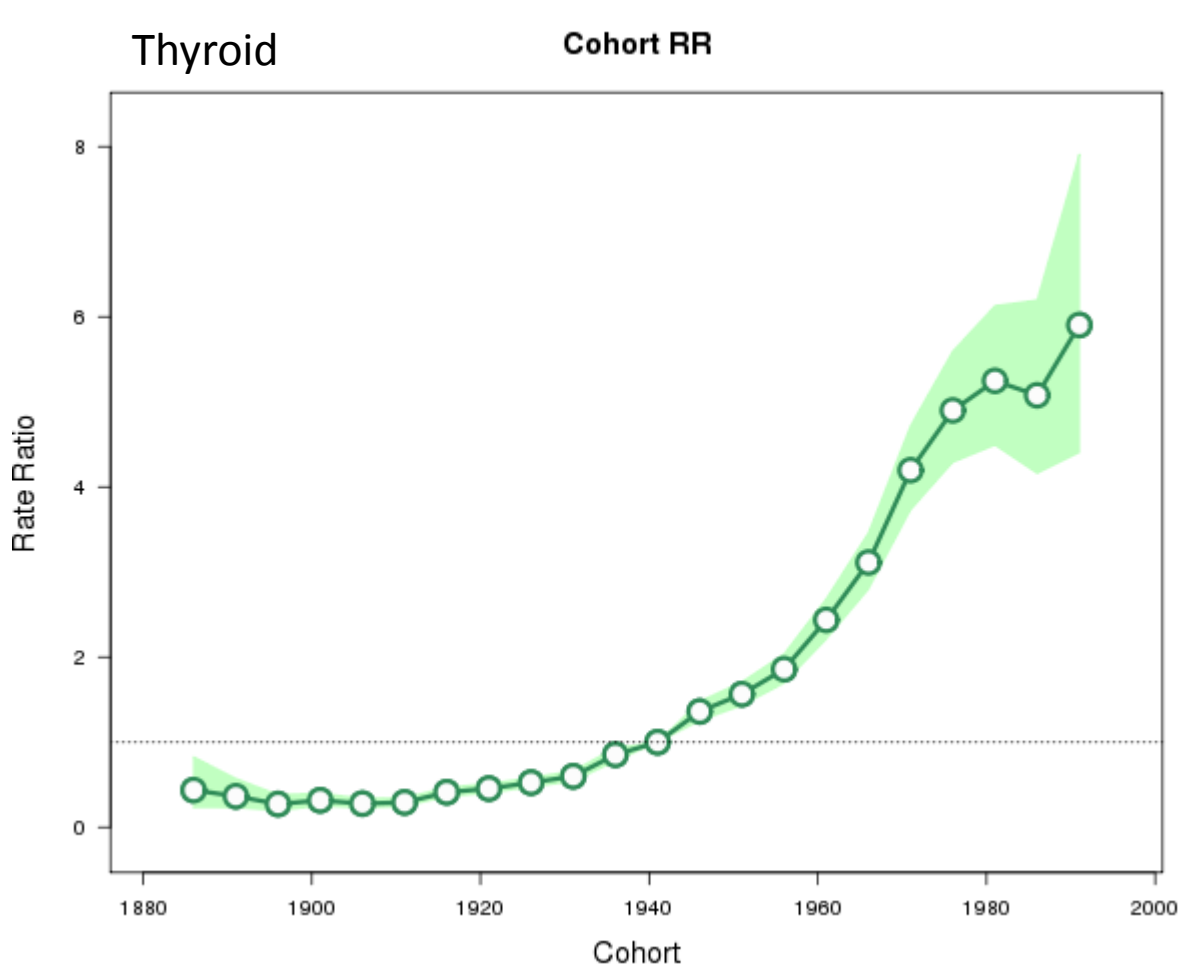

Figure 2 continued. Cancer incidence rate ratios (95% confidence intervals represented by shaded area) by five-year cohort in males relative to the 1941-1945 reference category.
